# THIS MONTH IN *Anesthesiology*

## Clonidine as an Adjuvant to Local Anesthetics for Peripheral Nerve and Plexus Blocks: A Meta-analysis of Randomized Trials (Review Article) ..... 406

Clonidine added to intermediate or long-acting local anesthetics for single-shot nerve blocks prolongs duration by about 2 h. Side effects may limit its usefulness.

## Analysis of Memory Formation with General Anesthesia (Propofol/Remifentanyl) for Elective Surgery Using the Process-dissociation Procedure ..... 293

A process-dissociation procedure, which corrected for guessing, was used to determine if more accurate results of auditory memory could be obtained.

## Anesthesia for Noncardiac Surgery in Adults with Congenital Heart Disease (Clinical Concepts and Commentary) ..... 432

The perioperative implications of adults with congenital heart disease undergoing noncardiac surgery are reviewed.

## Intravenous Infusion Tests Have Limited Utility for Selecting Long-term Drug Therapy in Patients with Chronic Pain (Review Article) ..... 416

Intravenous infusion tests have limited utility for predicting analgesia in chronic pain patients.

## Methoxycarbonyl-etomidate: A Novel Rapidly Metabolized and Ultra-short-acting Etomidate Analogue that Does Not Produce Prolonged Adrenocortical Suppression .. 240

Etomidate, has limited clinical utility due to suppression of adrenocortical steroid synthesis. The first etomidate analogue, (R)-3-methoxy-3-oxopropyl1-(1-phenylethyl)-1H-imidazole-5-carboxylate (MOC-etomidate), was designed to be susceptible to ultra-rapid metabolism to reduce this effect. MOC-etomidate potently enhanced  $\gamma$ -aminobutyric acid type A receptor function and demonstrated first-order metabolism in human liver homogenates with an *in vitro* half-life of 4.4 min compared with > 40 min for etomidate. A rapid, brief loss of righting reflex and minimal hemodynamic changes were observed in rats without adrenocortical suppression. MOC-etomidate, is rapidly metabolized, ultra-short-acting, and does not produce prolonged adrenocortical suppression and maintains the favorable pharmacologic properties of etomidate. See the accompanying Editorial View on page 229

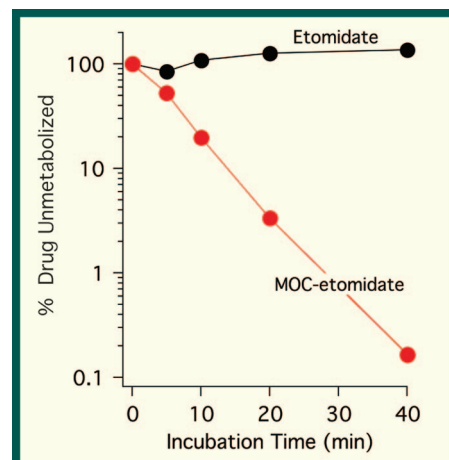

## Moderate Exposure to Allogeneic Blood Products Is Not Associated with Reduced Long-term Survival after Surgery for Coronary Artery Disease ..... 327

Blood transfusion may have an adverse effect on long-term health. A prospective observational study assessed long-term survival in patients undergoing coronary artery surgery who received a perioperative allogeneic blood transfusion. Health outcomes of 1,841 consecutive patients with isolated nonemergency first-time coronary artery surgery and survival > 60 days after surgery were determined. Of the 1,062 patients transfused, 266 died (mean follow-up of 8.1 yr). A new malignant condition was recorded on the death certificate of 27% of patients who were transfused, compared with 43% who were not. Transfusion of blood products was not associated with long-term survival. Patients undergoing coronary artery surgery who have received moderate amounts of blood ( $\leq 6$  units) should be reassured that they are unlikely to experience a reduction in long-term survival.

## Prognostic Value of Brain Natriuretic Peptide in Noncardiac Surgery: A Meta-analysis ..... 311

To assess the prognostic value of elevated brain natriuretic peptide (BNP) or N-terminal pro-brain natriuretic peptide (NT-proBNP) levels in predicting mortality and major adverse cardiovascular events (MACE), a meta-analysis was performed of studies in patients undergoing noncardiac surgery using unrestricted MEDLINE and EMBASE searches. Preoperative BNP elevation was significantly associated with an increased risk of short-term MACE (< 43 days postsurgery), all cause mortality, and cardiac death. Elevated NT-proBNP levels were also predictive. Preoperative BNP elevation was also significantly associated with an increased risk of long-term MACE (> 6 months) and all cause mortality. These data suggest that elevated BNP and NT-proBNP levels may identify patients undergoing major noncardiac surgery at high risk of cardiac events.

## Oxygen Tissue Saturation Is Lower in Nonsurvivors than in Survivors after Early Resuscitation of Septic Shock ..... 366

Growing evidence suggests that microvascular dysfunction is the key element of the pathogenesis of septic shock. This retrospective study assessed the outcome and muscle tissue oxygenation ( $StO_2$ ) of septic shock patients after early resuscitation using early goal-directed therapy.  $StO_2$  was monitored in septic shock patients using a tissue spectrometer. No difference was observed between groups with the exception of pulse oximetry saturation ( $SpO_2$ ; 94% vs. 97%,  $P = 0.04$ ). The  $StO_2$  values were significantly lower in nonsurvivors than in survivors (73% vs. 84%,  $P = 0.02$ ). Further investigations are required to determine if correction of an impaired level of  $StO_2$  improves patient outcomes.
